# Supplementary material for: Deposition of carbonaceous species over Ag/alumina catalysts for the HC-SCR of NOx under lean conditions: a qualitative and quantitative study
Source: Royal Society of Chemistry journal article supplement (doi:10.1039/c1cy00224d), 2011-01-01
Supplement: c1cy00224d.pdf [file c1cy00224d.pdf]

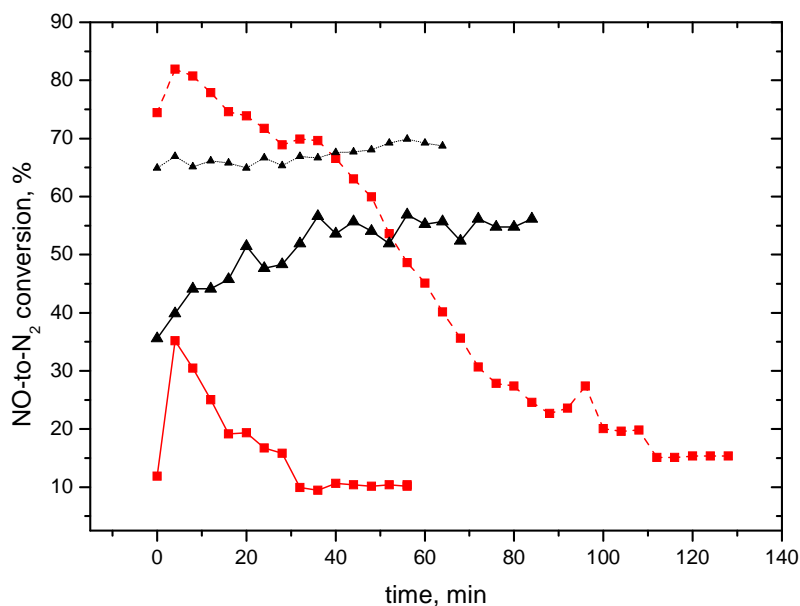

**Fig. S1.** Time-on-stream (TOS) behaviour over the Ag/alumina catalysts at 250 (■) and 450 (▲) °C in the presence (dash) or absence (solid) of hydrogen using hexadecane as the reductant (fast measurements intervals). Gas flow: 500 ppm NO, 188 ppm n-C<sub>16</sub>H<sub>34</sub>, 6 vol.% O<sub>2</sub>, 12 vol.% H<sub>2</sub>O, 0 or 1 vol.% H<sub>2</sub> and He balance. GHSV = 60 000 h<sup>-1</sup>.

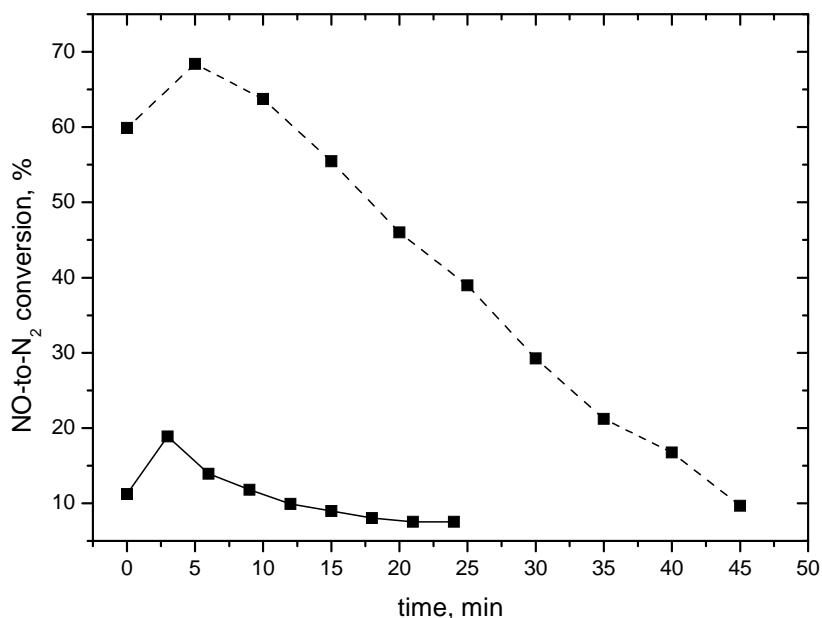

**Fig. S2.** Time-on-stream behaviour over the Ag/alumina catalysts at 250 °C, in the presence (dashed) or absence (solid) of hydrogen with diesel as a reducing agent (fast measurements intervals). Gas flow: 500 ppm NO, 250 ppm diesel, 6 vol.% O<sub>2</sub>, 12 vol.% H<sub>2</sub>O, 0 or 1 vol.% H<sub>2</sub> and He balance. GHSV = 60 000 h<sup>-1</sup>.

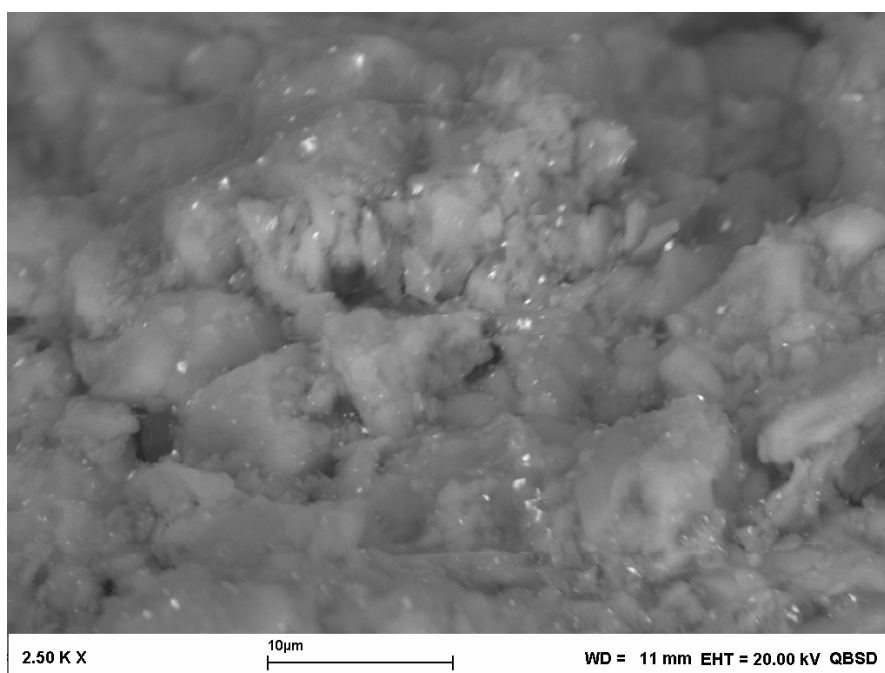

**Fig. S3.** SEM micrograph of sample 1. 2500X
